# Supplementary material for: Non–linear intensification of Sahel rainfall as a dynamic response to future warming
Source: Copernicus journal article supplement (doi:10.5194/esd-2016-59), 2016-11-30
Supplement: Supplementary file [file esd-2016-59-AC1-supplement.pdf]

## Final author comments

We would like to thank all reviewers for their helpful and constructive comments. Below we detail our responses to the individual comments.

### Referee #1 (M. Gaetani)

*Page 2, line 19: Add Park et al. 2015, on the northern-hemispheric differential warming impact on the projected Sahel rainfall (<http://www.nature.com/articles/ncomms6985>).*

Thank you for pointing out this paper which indeed is relevant in this context. We have added the reference.

*Page 2, lines 19-21: Other than the magnitude of the big drought, it would be interesting also to analyse the model ability in reproducing the decadal variability in the historical period.*

We agree that the magnitude of the 70s/80s drought is only one of many aspects of historical model performance. Biasutti (2013) have studied the CMIP5 model ensemble's performance in some more detail and report that, similar to the CMIP3 ensemble, most models underestimate the multi-decadal oscillations observed in Sahel rainfall. At the same time, they state that "Individual coupled simulations do reproduce the decadal ups and downs of the observed Sahel rainfall: Held et al. [2005] documented the case of one GFDL model, and we see the same for one MIROC model (not shown)". So, while a more in-depth evaluation of the CMIP5 models' historical simulations is beyond the scope of our present study, we note that our results are consistent with those of Biasutti (2013) and that readers might refer to that study. In particular, the inset in our new Fig. 2 (previously Fig. 1) shows that the MIROC-ESM-CHEM model not only reproduces the magnitude of the 70s/80s drought but also the multi-decadal variability during the rest of the 20<sup>th</sup> century (despite an overestimation of inter-annual variability).

We have amended the corresponding paragraph in the manuscript as follows: "Although we focus here on the future projections, we also note that the Wet7 models perform better than average in reproducing the magnitude of the 1970–1989 drought period, the three MIROC models especially being very close to observed values (orange lines in Fig. 1, and inset in Fig. 2). This observation is consistent with a more comprehensive analysis of the CMIP5 models for the historical period (Biasutti, 2013), which found that past multi-decadal variability is underestimated by all except a few models, one MIROC model among them. It may serve as an additional motivation to further study the future projections by these models, which we do in the following."

*Page 2, lines 31-33: What does "particularly pronounced" exactly mean? Please detail the method to select precipitation and moisture transport boxes in Figure 4.*

We have amended the text as follows: “In order to examine temporal patterns of rainfall and SST change more closely, we average each model’s summer rainfall over a rectangular subregion of the Sahel (solid boxes in Fig. 4 and 5). The subregions are chosen to encompass an area where the rainfall increase is substantial in both absolute (Fig. 4) and relative terms (Fig. 5), and to be similar in size and location across the different models’ grids (except for CanESM2 where the rainfall increase is located further east than in the other models). Thus, the subregions are generally located northward of the present-day core monsoon regions, which also see rainfall increases but less pronounced in relative terms.”

We have also amended Figure 5 to include relative rainfall changes, and thereby help understand the choice of the boxes. The following text was added to the caption of Fig. 5: “...colours show relative (rather than absolute) rainfall differences, in multiples of the reference value”.

*Page 3, lines 1-3: This is the main issue in the paper. You state that “a substantial part of today’s Sahel moisture is sourced from the Mediterranean”, and this has been shown to be one of the key areas in future GW scenarios (Park et al. 2016). Then you state that the flux from the Mediterranean is negligible compared to the tropical Atlantic. This should be substantiated. A comparison between tropical Atlantic and Mediterranean moisture sources should be shown, as well as a comparison between the effects on precipitation of the SST warming in both the basins.*

We did not want to imply that the moisture flux from the Mediterranean is negligible; only that the simulated increase in moisture flux from the Mediterranean is smaller than the increase in moisture flux from the Atlantic. Indeed, when looking at the absolute magnitude of the moisture flux (rather than the change), it becomes visible that while in the past there was even a larger moisture flux from the Mediterranean than from the Atlantic into the area under consideration, this changes in the future, when both regions contribute similarly to the moisture influx (figure below). This is consistent with our hypothesis of the establishment of a substantial monsoon circulation in the northern part of the Sahel, which thus becomes more connected with the Atlantic moisture source.

Nevertheless, we acknowledge the role that the Mediterranean moisture source plays in *setting the stage* for this monsoon expansion: As SSTs warm in the Mediterranean as well as the Atlantic, both regions can supply more moisture and, thereby, latent heat to the continent. This increased latent heating of the Sahelian troposphere can then trigger the proposed feedback mechanism by drawing in more moist air from the tropical North Atlantic. Such a generalized view – an initial moisture increase supplied from multiple sources, triggering an enhanced monsoon inflow from the Atlantic – is also consistent with the simulated changes in lower troposphere winds: we see an increase in (south-)westerly flow from the North Atlantic, but no increase in winds from the Mediterranean. Moreover, it is consistent with a mechanism already proposed by (Rowell, 2003) when discussing the impact of Mediterranean SSTs on Sahel rainfall.

We have amended the manuscript to account for this more general picture, and thank the reviewer for the useful remarks. With respect to the suggested “comparison between the effects on precipitation of the SST warming in both the basins”: This would, in the strict sense, only be

possible by running independent model simulations where SST in either one of the basins is held fixed while the other basin is warming. However, we have included the below figure (absolute moisture fluxes; new Fig. 6 in the revised manuscript), and have amended Fig. 4, and believe that these already provide a good indication of the relative role of both basins.

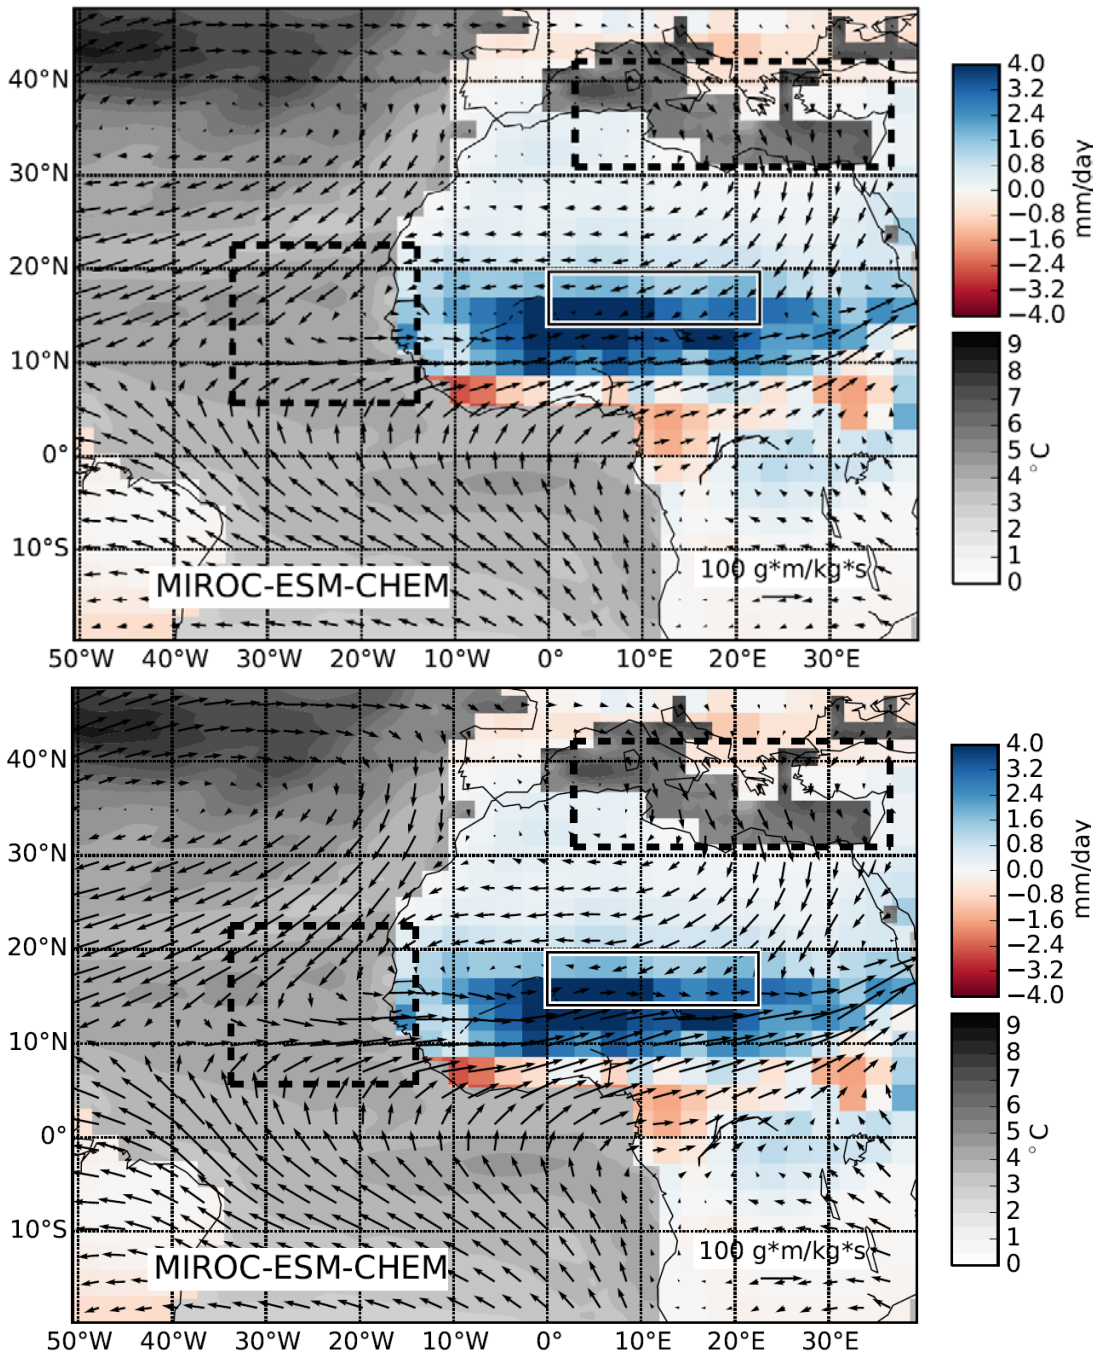

Figure above: As figure 4 (top panel) in the manuscript, but showing the absolute magnitude of moisture flux in the past (1850-1999; top) and the future (2070-2099; bottom).

Figure 2: Is the magnitude of drought computed as drought minus no-drought? So models reproducing drought should give negative values. I think it would be better to change the sign, also for coherence with the changes by the end of the 21st century. Moreover, in the text you state that Wet7 models are “better than average in reproducing drought magnitude”, therefore I suggest to add the multimodel mean to the plot, to show this.

In fact, in this figure, the magnitude of drought was computed as no-drought minus drought. We admit that this choice was somewhat counter-intuitive, and have changed it. We have also indicated in the figure the median deviation from the observed drought magnitude across the models; such that it becomes visible which models have a smaller-than-median deviation. The updated figure and caption are as follows (including new numbering since we have swapped figures 1 and 2):

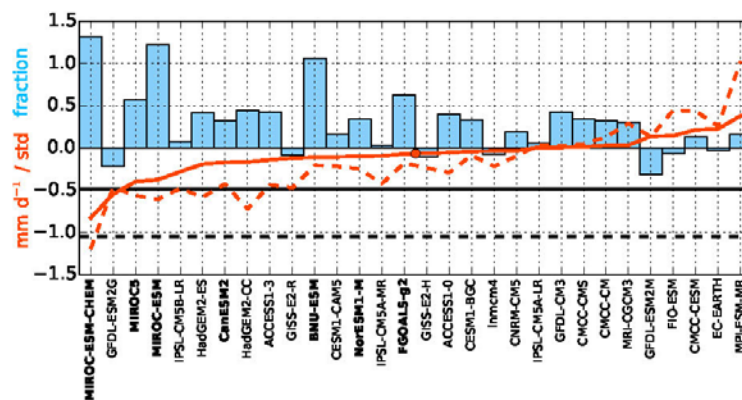

Figure 1. Past and future Sahel summer rainfall in CMIP5 coupled climate models. Blue bars show the change in central and eastern Sahel average summer rainfall (0–30°E, 10–20°N, July–September) by the end of the century (2071–2095) under RCP8.5 compared to the 1901–1999 average, as fraction of that average. The seven models investigated in detail in this paper (Wet7 subset) are marked in bold. The solid orange line shows the difference (drought minus non-drought) between the 1970–1989 drought period and the rest of the observational period (“non-drought”, 1901–1969 and 1990–2009), in mm/day. The dashed orange line shows the same difference divided by the standard deviation of the non-drought period, in units of standard deviations. Black horizontal lines show the respective observed values (CRU TS3.1, Harris et al. (2014)). The orange circle indicates the median deviation from the observed drought—non-drought difference across the model ensemble; i.e. models shown to the left of this point are closer than average to the observed value.

Figure 6: How do you obtain precip-SST plots? Do they refer to 21st century only? Please clarify this.

This refers to the whole period 1850-2100. Sorry for not being clear about this in the figure caption. We have amended the caption text.

Figure 7: It would be very useful to add the SST time series to precipitation.

Thanks for the suggestion. We have added the SST time series to this figure (Fig. 9 in the revised manuscript).

*Figure 8: I think showing again MIROC-ESM-CHEM is redundant, better to show the multimodel mean, alongside the conceptual scheme.*

Averaging over multiple models would tend to iron out the individual models' internal variability and to obscure any potential correlation between a model's SST and rainfall on short time scales. Therefore we believe that the multi-model mean would not be representative of the dynamical processes we are interested in, and we prefer to compare a single model run with the conceptual scheme. We admit that the information in the left-hand panels of Figure 8 (new Figure 10) has been shown in previous figures, but argue that Figure 8 primarily serves the comparison between the model data and the theoretical concept, and for that purpose it is advantageous to combine both in one figure.

That being said, we have revised Figure 8 (new Figure 10) to show more stylized versions of the MIROC-ESM-CHEM graphs, with the conceptual graphs overlaid on them. This should help to further draw attention to the qualitative comparison, and away from the specific model results which are already presented in previous figures.

#### Referee #2 (anonymous)

*1 - Authors have chosen the wettest models (wet7 subset of models from the CMIP5 ensemble) in the Sahelian region by the end of 21th century. Any other criterion could be chosen (e.g. the driest models). There is no explicit evidence in the paper why the wet7 subset is the one from which one expects better future rain predictions in Sahel. Models have biases, both in the average, standard deviation, extremes etc. as we compare model simulations with a reference observed period (like that shown in Fig. 1: from ~1900 to ~2000).*

We do not aim to select the models from which we expect better future predictions. Rather, we single out those models which exhibit a pronounced increase in Sahel rainfall in the future (and in particular, in areas which today receive little rainfall), and investigate the potential reason why these models behave differently than the majority of other models, which only show weak trends. The fact that the Wet7 models perform better than average in reproducing the magnitude of the 70s/80s drought is an interesting additional finding, but was not a criterion in the selection of the models.

We have amended and restructured the respective section of the manuscript and hope that the choice of models becomes clearer now. We have also swapped Figures 1 and 2 to align better with the discussion in the text.

*Moreover, authors say in pg. 2 lines 19-21: 'At the same time, we note that the Wet7 models perform better than average in reproducing the magnitude of the 1970–1989 drought period'. I should stress that, from Fig. 1 you cannot conclude the above sentence from information displayed on Fig. 1.*

It's true that this figure (previous figure 1/new figure 2) only highlights the performance of one model (MIROC-ESM-CHEM). That is why we cited both figures 1 and 2 in this sentence. The two figures together support this sentence.

*Therefore, a simple table of statistical biases should be included to clarify the performance of wet7 subset in the reference period as compared with other models.*

We believe that the new figure 1 (revised version of previous figure 2) serves the purpose of comparing all the models' performance for the historical drought period, and might be better accessible than a table. We note that a more comprehensive evaluation of model performance is not trivial (as the referee mentions, there are many different statistical properties that could be investigated, not to mention numerous dynamical features relevant to Sahel rainfall) and is not the focus of our present study. As mentioned in the response to referee #1 (and in the revised manuscript), previous studies have evaluated these models in more detail and may serve as a reference.

*2 - The non-linear response P-SST (on Fig. 8), which is the main paper's result is quite interesting but deserves much explanation. Only a single phrase at the end of Section 2 refers Fig. 8 and the non-linear relationship. Authors should clarify some points.*

We are sorry that the paper might have been too concise on this point. We have expanded the text at the end of section 2 as well as the corresponding figure caption (which is now Figure 10, due to the addition of two more figures).

*- Fig. 8 shows the non-linear relationship P-SST. It is evident that some smoothing and composite averaging is done to minimize noise. Please clarify that. Do P and SST are taken over some running averages? Do results change if the binning length is shortened? What is the delay in the proposed moisture-advection feedback?*

No running average is applied to P or SST before the binning is done. If the binning length is shortened, results do not change qualitatively, although the picture indeed becomes noisier (see example below) and each bin contains less data points on average.

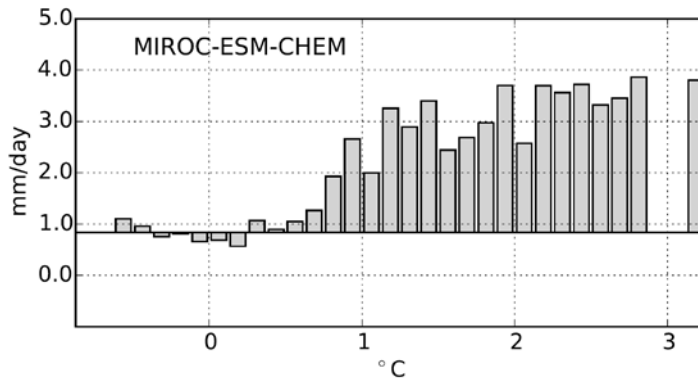

Figure above: As Figure 6 (top) in the paper but with bin width reduced by half, and showing results for all bins regardless of the number of data points that a bin contains (whereas in the manuscript only bars with at least 5 underlying data points are shown).

The moisture-advection feedback arises from energy balance considerations (Levermann, Schewe, Petoukhov, & Held, 2009; Schewe, Levermann, & Cheng, 2012) and has no inherent time scale. Thus there is no delay: If in a given year conditions are favorable (e.g. high SST leading to high evaporation rate over ocean and high moisture supply to continent) then a continental monsoon can develop in that year, independent of previous or successive years.

If delay refers to the typical travel time of the monsoon circulation that carries the moist air and is fueled by latent heat release over the continent, then that time scale should be on the order of a few days to weeks, given typical near-surface wind velocities of a few meters per second.

#### Minor points

4 - In pg. 1, line 13: *Precise in the text the periods with episodes of heavy rainfall in the text.*

We have amended the sentence as follows: "...episodes of abundant rainfall such as in the 1930s and 50s, and even destructive rain and flood events such as in 2007 (Tschakert et al., 2010; Tarhule, 2005)."

5 - Fig. 1 In the caption, the thick grey curves are quite indicative of the trend. However, the light grey lines for the two sets of models are totally overlapped becoming useless. It would be much clear to show the temporal curves of the interval range, i.e. the minimum and the maximum over each model set (the 7-model set and the 23-model set).

We have changed the figure accordingly; now only the envelope and the mean of each model subset are shown.

6 - pg. 2, lines 27-28 Authors say: 'This suggests that the rainfall increase is not simply a consequence of thermodynamic changes, but part of a shift in West African monsoon circulation dynamics' Justify the first sentence please.

In a warming atmosphere, one could expect to see increasing rainfall simply due to the higher water-holding capacity of the air, according to the Clausius–Clapeyron relation. If this were the

only cause of the rainfall increase in the Sahel, we would not expect to see substantial changes in wind speed; moisture transport would only increase because of the higher moisture content of the monsoon winds. The fact that we observe increasing wind speeds towards the north and east of the present-day monsoon region indicates a spatial extension of the monsoon domain.

We have amended the sentence: "This suggests that the rainfall increase is not simply a consequence of thermodynamic changes (higher water-holding capacity of warmer air), but goes together with a shift in West African monsoon circulation dynamics."

7 - Fig 2. Caption is 'Solid black line shows the difference in average summer precipitation (mm/day, averaged over 0-30\_E, 10-20\_N) between the 1970–1989 drought period and the rest of the observational period ("non-drought", 1901–1969 and 1990–2009). Therefore we expect a negative anomaly: 'drought period' minus 'observed nondrought period'. Like in other parts of the paper, it is not understood what is the subtrahend and the minuend of the subtraction.

We apologize for the lack of clarity here. As mentioned above in response to referee #1, we have revised this figure and the corresponding caption. The caption now clearly states what is the subtrahend and the diminuend; and the choice of sign is more intuitive (negative values for drought).

8 - Fig. 3. Caption: Change the word 'Difference' to the word 'Deviation from'. Difference between A and B is A minus B, so please clarify the caption.

We have changed the caption as follows: "Change (future minus past) in average Sahel daily precipitation between the end of the 20th century (1970–1999) and the end of the 21st century (2070–2099)...".

9 - Fig. 4 There is no grey color bar for the SST anomalies. At least indicate where is the zero value.

We have included a greyscale color bar for the SST anomalies in Fig. 4.

#### Short comment #1 (P.-A. Monerie)

Page 1 - There is a typo, line 22 "(Biasutti, 2013) - line 24, the reference should be placed after "Sahel rainfall". You can also cite Fontaine et al. (2011), among others Fontaine B, Roucou P, Monerie P-A (2011) Changes in the African monsoon region at medium-term time horizon using 12 AR4 coupled models under the A1b emissions scenario. Atmos Sci Lett 12:83–88. doi:10.1002/asl.321

Thank you very much for this hint. We have included this reference, and corrected the placement of the citation.

Page 2 - Line 18 "The positive trend.." is in fact obtained in at least 80 % of the CMIP5 simulations in Biasutti (2013), it is not only due to the wet7



We agree that a majority of the models show a positive trend – as is also visible in our new Figure 1 (previously Figure 2). We refer here to the *ensemble mean* trend and the fact that only a few models exhibit a *substantial* positive trend. E.g., only five models (which all belong to the Wet7 subset) exhibit a rainfall increase larger than 50% by the end of the century (new Fig. 1).

We have revised the corresponding text as follows, to improve clarity: “Taken together, these seven models—hereafter referred to as the “Wet7” subset—can largely account for the positive rainfall trend that has been found in the CMIP5 ensemble as a whole (cf. Roehrig et al., 2013; Park et al., 2015): The Wet7 multi-model mean shows a doubling of average summer rainfall by 2100 (Fig. 2). In contrast, the mean over the 23 other models exhibits only a weak wetting trend of less than 20%; trends in the individual models are small and some models even show a drying trend.”

*Line 19-21: The Wet7 is able to reproduce the 1970-1989 drought magnitude, but what is your conclusion? Do you think these models projections to be more reliable? Do there is a link between the projection and a models ability to reproduce the current climate?*

We do not think that a model’s ability to reproduce past and current climate necessarily means that its projections will be reliable. Conversely, if a model does *not* reproduce past and current climate realistically, its projections may be treated with particular scrutiny. Thus, as mentioned in our response to Reviewer #1, the observation that the Wet7 models perform relatively well in reproducing the drought magnitude is not by itself a proof of the quality of their projections; but it is a motivation to take their projections into serious consideration and to further investigate why these projections differ from the rest of the ensemble.

We have amended the corresponding paragraph in the manuscript in order to be clearer about the rationale: “Although we focus here on the future projections, we also note that the Wet7 models perform better than average in reproducing the magnitude of the 1970–1989 drought period, the three MIROC models especially being very close to observed values (orange lines in Fig. 1, and inset in Fig. 2). This observation is consistent with a more comprehensive analysis of the CMIP5 models for the historical period (Biasutti, 2013), which found that past multi-decadal variability is underestimated by all except a few models, one MIROC model among them. It may serve as an additional motivation to further study the future projections by these models, which we do in the following. We point out, however, that there is much variation among the Wet7 models themselves in terms of past and projected rainfall changes, and the dynamical features discussed below may be more or less developed in different models. We use the wettest model, MIROC-ESM-CHEM, to illustrate our discussion, and show the other six models as evidence that our findings are not exclusive to just one model.”

*Line 22: "The seasonal distribution.." It is also the case for the other models (not only with the Wet7). You do not comment the large spread obtained with Figure3.*

The seasonal distribution indeed shows a similar shape as in the Wet7 also in *some* of the other models – but not in all models: See the figure below. This figure also shows again how the Wet7

models (in particular the wettest 5 models) stick out from the ensemble simply in terms of the magnitude of the rainfall change.

In any case, our statement “The seasonal distribution of the rainfall change in the Wet7 shows a clear monsoonal shape” is valid. We mention this not so much as a distinction against the other models, but as an indication of the dynamical change that is behind the simulated rainfall change, namely an intensification and expansion of the West African monsoon, as discussed in the remainder of the paragraph.

We have amended the statement to account for the spread in Figure 3: “The seasonal distribution of the rainfall change in the Wet7 shows a clear monsoonal shape, despite considerable spread in its magnitude (Fig. 3).”

We have also slightly changed Figure 3: previously, it showed rainfall averaged over the rectangular area indicated in Figure 4, i.e. a slightly different area for each model. This was inconsistent with the main text, which we apologize for. Now, consistent with the text, Figure 3 shows rainfall averaged over the common region 10-20°N, 0-30°E as in Figure 1 and 2. This change does not affect the above statement or any other findings in the paper.

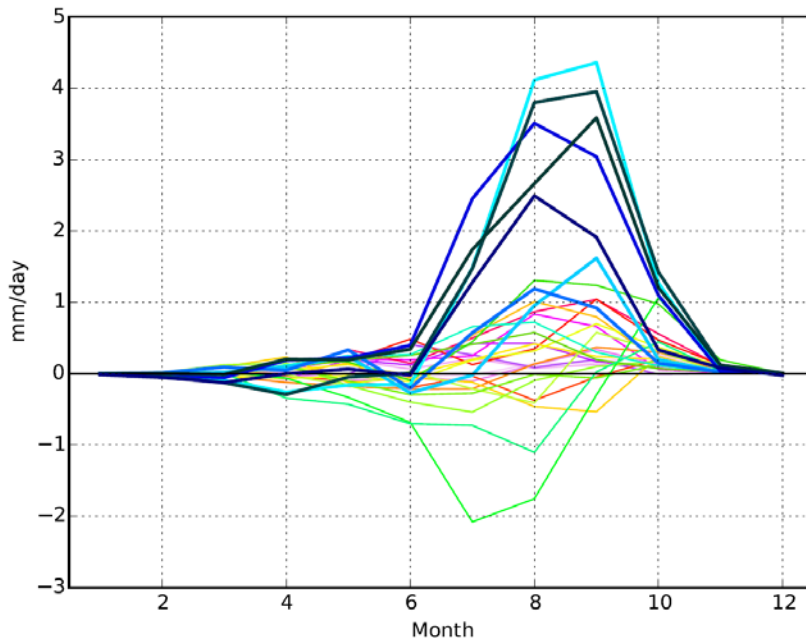

Figure above: As figure 3 in the manuscript but based on monthly rainfall (not daily) and including all models; the Wet7 models are indicated by thick lines in bluish colors. Rainfall is averaged over 10-20°N, 0-30°E for all models.

Page3 - Line 1-3: Is it in contradictory with Park et al. (2016)?

See our response to reviewer #1 (4<sup>th</sup> point). We have amended the manuscript (including additional figures) to account for the role of Mediterranean SSTs in supplying additional moisture and thus setting the stage for the dynamic response of the monsoon circulation. This proposed mechanism is in fact consistent with the importance of Mediterranean SSTs emphasized by Park et al. (2016).

*Line 4: Are you analysing the global SSTs? This sentence is not clear Did you found the same results focusing on the North Atlantic Ocean, or the Mediterranean Sea?*

We are analyzing SSTs only in the tropical North Atlantic and (new) Mediterranean moisture source regions shown as boxes in Fig. 4 and 5; not global SSTs. We have indicated this in the main text and in the caption of Fig. 7. As we show in the revised manuscript, we find a similar rainfall-SST behavior for the tropical North Atlantic and the Mediterranean, but only the Atlantic moisture flux increase is linked to an increase in wind speed.

*Figure - Figure7: if we only consider the period with a continuous increase in the GHGs concentration, (the RCP8.5 emission scenario starts in 2005-2006), is the precipitation increase so abrupt?*

CO<sub>2</sub> concentrations have increased continuously throughout the simulation period. As new Fig. 9 (previously Fig. 7) shows, precipitation begins increasing substantially in the early 21<sup>st</sup> century. If we were to remove the years before 2005 from the analysis, we would still see the increase in precipitation, but we would lack the long period of relatively stable precipitation before the 21<sup>st</sup> century. It would then be hard to define what 'abrupt' means, as there would be no historical period for comparison. The abruptness, in the time domain, is seen in the long period of relatively stable precipitation followed by a steep increase.

Jacob Schewe (on behalf of all authors)

## References

- Biasutti, M. (2013). Forced Sahel rainfall trends in the CMIP5 archive. *Journal of Geophysical Research: Atmospheres*, 118(4), 1613–1623. <http://doi.org/10.1002/jgrd.50206>
- Levermann, A., Schewe, J., Petoukhov, V., & Held, H. (2009). Basic mechanism for abrupt monsoon transitions. *Proceedings of the National Academy of Sciences of the United States of America*, 106(49), 20572–7. <http://doi.org/10.1073/pnas.0901414106>
- Rowell, D. (2003). The impact of Mediterranean SSTs on the Sahelian rainfall season. *Journal of Climate*. [http://doi.org/10.1175/1520-0442\(2003\)016<0849:TIOMSO>2.0.CO;2](http://doi.org/10.1175/1520-0442(2003)016<0849:TIOMSO>2.0.CO;2)
- Schewe, J., Levermann, A., & Cheng, H. (2012). A critical humidity threshold for monsoon transitions. *Climate of the Past*, 8(2), 535–544. <http://doi.org/10.5194/cp-8-535-2012>
